# Supplementary material for: Hyperfine couplings between the paramagnetic moment and nuclei in the metallic phase of low silica X zeolite loaded with potassium
Source: Royal Society of Chemistry journal article supplement (doi:10.1039/d4dt00599f), 2024-01-01
Supplement: d4dt00599f1.pdf [file d4dt00599f1.pdf]

**Supplementary material for “Hyperfine couplings between  
paramagnetic moment and nuclei in the metallic phase of low  
silica X zeolite loaded with potassium”**

Mutsuo Igarashi,<sup>1,\*</sup> Tadashi Shimizu,<sup>2</sup> Atsushi Goto,<sup>2</sup>  
Kenjiro Hashi,<sup>2</sup> Keiko Yamamichi,<sup>1</sup> and Takehito Nakano<sup>3</sup>

<sup>1</sup>*National Institute of Technology, Gunma College,  
Maebashi, Gunma 371-8530, Japan.*

<sup>2</sup>*National Institute for Materials Science, Tsukuba, Ibaraki 305-0003, Japan.*

<sup>3</sup>*Institute of Quantum Beam Science,  
Graduate School of Science and Engineering,  
Ibaraki University, Mito, Ibaraki 310-8512, Japan*

TABLE I. Fit parameters of the  $^{23}\text{Na}$  NMR spectrum of  $\text{K}_{9.0}/\text{Na}_4\text{K}_8\text{-LSX}$ .

| Component      | Width (ppm) | Height (a.u.) | Shift (ppm) | Integrated intensity ratio (%) |
|----------------|-------------|---------------|-------------|--------------------------------|
| P <sub>1</sub> | 72          | 13            | 574         | 9                              |
| P <sub>2</sub> | 220         | 40            | 857         | 80                             |
| @              | 60          | 21            | 1190        | 11                             |

Figure 1 shows the  $^{23}\text{Na}$  NMR spectrum of  $\text{K}_n/\text{Na}_4\text{K}_8\text{-LSX}$  with  $n = 9.0$  measured at 25 K. The black and red solid curves are the experimental data. We fit the shift components in the red region with a three-component Gaussian function with an appropriate background. The blue solid curve shows the fit result. Table I lists the fit parameters. The results have two main characteristics: the P<sub>2</sub> component is three or more times broader than the other components, and the integrated intensity of the P<sub>2</sub> component is dominant, accounting for 80% of the total. A discussion is provided in the main paper.

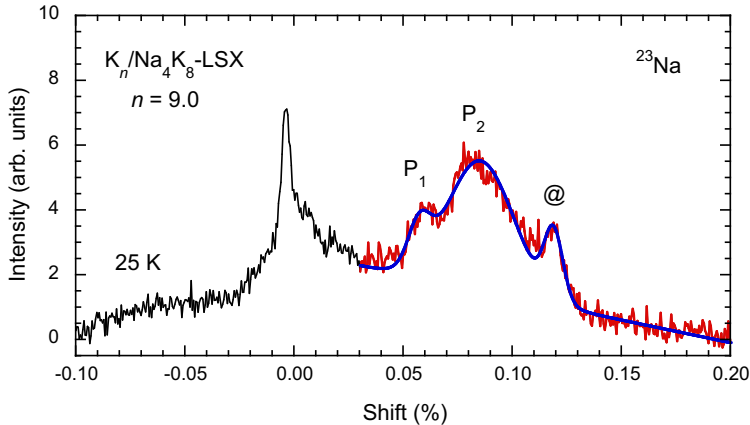

FIG. 1.  $^{23}\text{Na}$  NMR spectrum of  $\text{K}_n/\text{Na}_4\text{K}_8\text{-LSX}$  with  $n = 9.0$  measured at 25 K.

Figure 2 shows the  $^{27}\text{Al}$  NMR spectra of  $\text{K}_n/\text{Na}_4\text{K}_8\text{-LSX}$  with  $n = 9.0$  measured at 4 and 15 K. The gray solid curves are experimental results and the orange dashed curves are fit results. At temperatures lower than 25 K, the spectral tail becomes noticeably wider. By setting such the background with a quite wide Gaussian function, the fit in the four Gaussian components still works as well as in the cases above 25 K. Each component from A to D is also plotted separately.

\* igarashi@gunma-ct.ac.jp

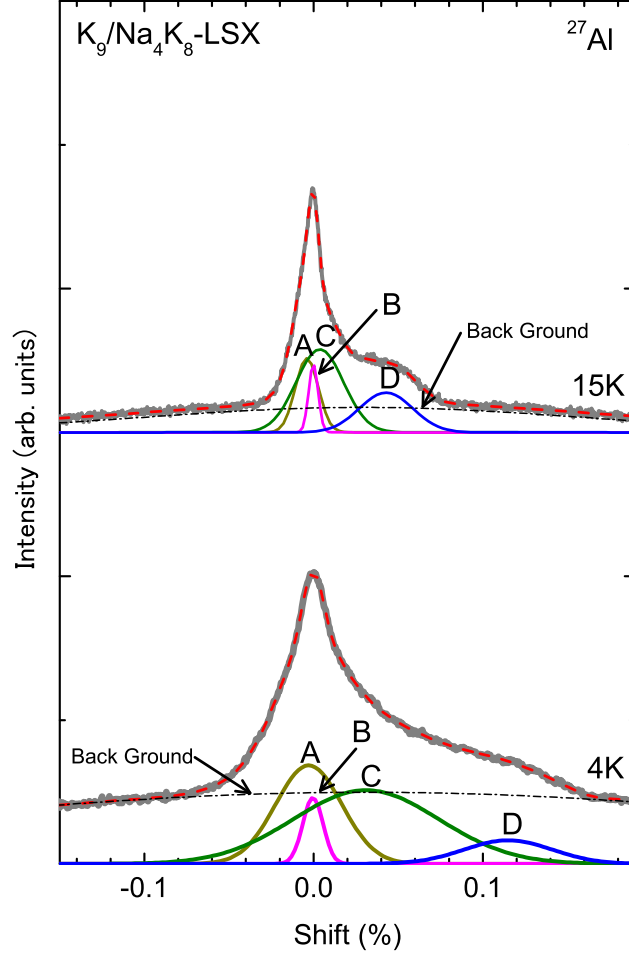

FIG. 2.  $^{27}\text{Al}$  NMR spectra of  $\text{K}_{9.0}/\text{Na}_4\text{K}_8\text{-LSX}$  measured at 4 and 15 K.

Figure 3 shows  $K$ - $\chi$  plot of  $^{27}\text{Al}$  NMR for  $\text{K}_{9.0}/\text{Na}_4\text{K}_8\text{-LSX}$  with the full temperature range. The linear line in the figure is drawn with least square fitting. The shift of the D component is well scaled with the susceptibility down to 4 K.

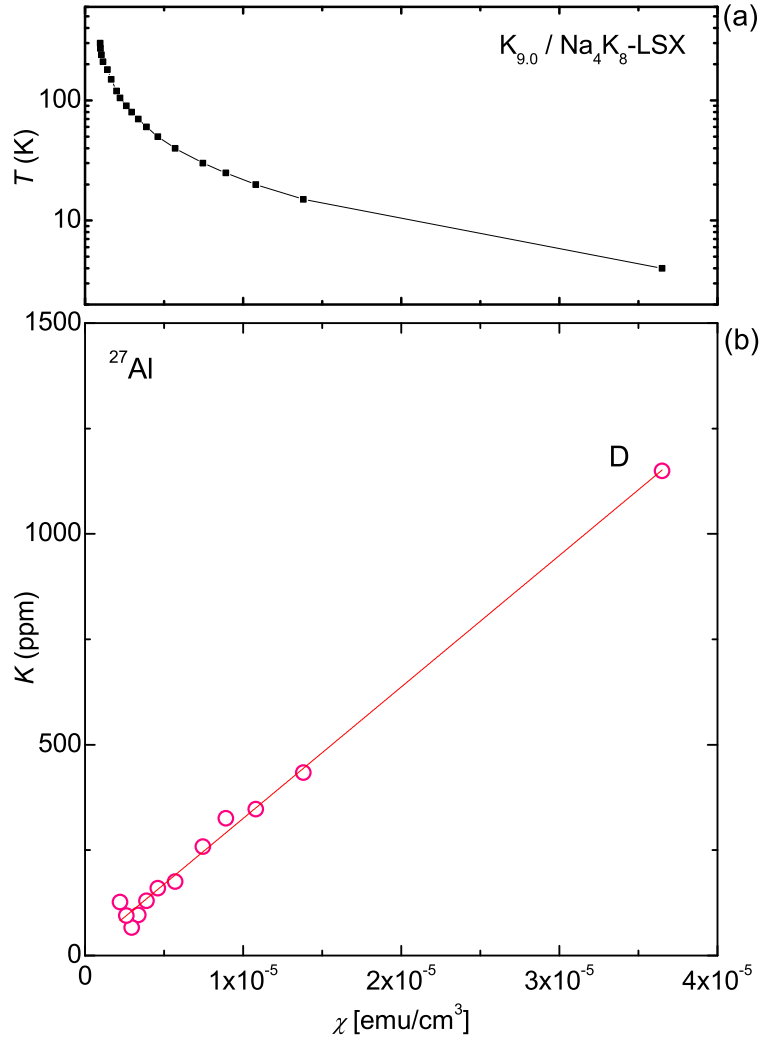

FIG. 3.  $K$ - $\chi$  plot of  $^{27}\text{Al}$  NMR for  $\text{K}_{9.0}/\text{Na}_4\text{K}_8$ -LSX with the full temperature range. (a) Temperature versus susceptibility. (b) Shift of D component versus susceptibility. The linear line in the figure is drawn with least square fitting.
